# Supplementary material for: Asymmetrical distribution of non-conserved regulatory sequences at PHOX2B is reflected at the ENCODE loci and illuminates a possible genome-wide trend
Source: PubMed Central journal article supplement (PMC2630312; doi:10.1186/1471-2164-10-8), 2009-01-07
Supplement: 1471-2164-10-8-S1.pdf [file 1471-2164-10-8-S1.pdf]

## Supplemental Tables

| Amplicon                 | Coordinates (hg18)     | Primer                                               |
|--------------------------|------------------------|------------------------------------------------------|
| <i>PHOX2B</i> -HNCS +1.7 | chr4:41443126-41444037 | F-AAGCAGGGGGAGAAAGAAGA<br>R-CTGGAGCCTCGAGTGAGAAG     |
| <i>PHOX2B</i> -HCS +0.6  | chr4:41444329-41445139 | F-AGACAGAAAGTGAGCAAATCAGC<br>R-GGACCTTCAGCTTTCTCAGC  |
| <i>PHOX2B</i> -HCS -0.0  | chr4:41445738-41446286 | F-GAATTTAATACCACACCATTAC<br>R-TTTTTAAGTGGCTGTATACCCT |
| <i>PHOX2B</i> -HCS -0.6  | chr4:41446311-41446680 | F-GCTTTCGAATGTGAAACATCTG<br>R-ACCCAAAAGCCTGAGGAATC   |
| <i>PHOX2B</i> -HCS -0.9  | chr4:41446705-41447657 | F-CTCCCCTCCCCTTCTCTTC<br>R-AGGAGCGAGCAGTGATTTGT      |
| <i>PHOX2B</i> -HCS -1.9  | chr4:41447684-41448427 | F-GCCCAGATCCCTTAGCTTCT<br>R-TTAAGGGAGGTGGGGGATAG     |
| <i>PHOX2B</i> -HCS -2.9  | chr4:41448641-41449895 | F-CCTTCTCGCCTTTGTACCAG<br>R-TCTTTTTGGAGAAGCCCAAG     |
| <i>PHOX2B</i> -HNCS -4.2 | chr4:41449900-41450781 | F-GTGGAGTGGGGCTTTGAAAT<br>R-CTGCAGACAGCAGCCTTTC      |
| <i>PHOX2B</i> -HCS -4.9  | chr4:41450785-41451074 | F-CTCCCCTCCCCTTCTCTTC<br>R-AAGCTTGGTCAGGGCTCAT       |

---

|                            |                        |                                                              |
|----------------------------|------------------------|--------------------------------------------------------------|
| <i>PHOX2B</i> -HNCS -5.3   | chr4:41451079-41454153 | F-TGAGACAAACAAACAGCAGCA<br>R-GGTGCAGAGGGGATTATGATT           |
| <i>PHOX2B</i> -HCS -8.4    | chr4:41454166-41456300 | F-TGGGTGGATCATCTGAGGTC<br>R-TAGGAGGTTTGTGGGGTTTG             |
| <i>PHOX2B</i> -HCS-34.8    | chr4:41480567-41483210 | F- GGGATTACAGGCATGATGTTTGGCTTT<br>R-TCTCTGCCATTTTTGCAGGCAATT |
| <i>PHOX2B</i> -HNCS -71.5  | chr4:41517243-41518675 | F-TCCCTATTTGTAGGGGGAAGA<br>R-ACCAGGCAAGTGTCTGTTCA            |
| <i>PHOX2B</i> -HCS -73.5   | chr4:41519203-41519532 | F-GCCTGGTGTCTGTGTCTCTG<br>R-TTCTCTTTCTCCCTCCCTGA             |
| <i>PHOX2B</i> -HCS +106.1  | chr4:41551816-41552776 | F-AAGGGCCTACACCAATAGGG<br>R-CAAAGGAGCACAACTAAACCTT           |
| <i>PHOX2B</i> -HCS-107.2   | chr4:41552948-41553287 | F-TTCTGGGCACACTCTGTTTG<br>R-AGTTAGAGGCAGGAATATTAGAAACAT      |
| <i>PHOX2B</i> -HCS -108.3  | chr4:41554016-41554539 | F-ATGGGGCAGGAAGGTTAAGT<br>R-TCCGCGTACCCAGAAAATAA             |
| <i>PHOX2B</i> -HNCS -110.6 | chr4:41556355-41556858 | FGGGACTATATAAAGACAACATTTTTCA<br>R-CCATATACTTTGCACCGCTTG      |
| <i>PHOX2B</i> -HNCS -112.3 | chr4:41558009-41560428 | F-TGCCACAGGGTTCTCATTACAGC<br>R-GGACCCGGGTATTCCCTTCCA         |

---

---

|                            |                        |                                                    |
|----------------------------|------------------------|----------------------------------------------------|
| <i>PHOX2B</i> -HCS -114.8  | chr4:41560500-41560924 | F-GAGGCAGCTGTGTGTGTTTG<br>R-CAGGTTTGTGCAGCCTTTTT   |
| <i>PHOX2B</i> -HNCS -115.3 | chr4:41561092-41562094 | F-GTGTGTGCTGGTGAAATTGG<br>R-GGCTGAGGAGGTGTCTTCAC   |
| <i>PHOX2B</i> -HCS -116.7  | chr4:41562431-41562641 | F-CACCGAATCCAAGTCTGTACTTT<br>R-CTGTGGTGAAGCCTGCATT |
| <i>PHOX2B</i> -HNCS -128.9 | chr4:41573637-41574910 | F-CGCCACCATACCCATCTAAT<br>R-CGCGGAAAATCTTTTGTTG    |
| <i>PHOX2B</i> -HCS -130.4  | chr4:41576125-41576259 | F-CTCACCCCTGGGAAGACTC<br>R-TGGATATGAAGATTTGCCGATA  |
| <i>PHOX2B</i> -HCS-133.5   | chr4:41579270-41579542 | F-TTCCAGACGGCTCTGACCT<br>R-CGGCCTATCCGAAATTACC     |

---

**Supplemental Table S1. Primers and genomic coordinates (March 2006 build; hg18) of amplicons generated from human genomic DNA.**

Amplicons named by their position relative to the transcriptional start site. F, forward primer; R, reverse primer.

**Supplemental Table S2. Enumeration of pTRRs and base pairs of whole ENCODE sub-regions.**

Distribution of putative transcriptional regulatory regions (pTRRs) partitioned into sub-regions from King et al. [26]. Conserved pTRRs are defined as regions overlapping the PhastCons Placental Mammal Conserved Elements, 28-way Multiz Alignment intervals [41, 43], non-conserved pTRRs defined as all other pTRRs. pTRRs were assigned to a partitioned region using Galaxy Gencode partition tool [55]. Base pairs in ENCODE partitioned sub-regions comes from summing up base pairs in each partitioned ENCODE defined region. Base pairs in conserved region is defined as sum of all genomic regions in the ENCODE region that are identified as PhastCons Placental Mammal Conserved Elements, 28-way Multiz Alignment intervals [43]. Non-conserved base pairs were calculated by subtracting conserved base pairs from total base pairs. Total repeat base pair was calculated by summing up the repeat masked base pairs in each sub-region. Conserved repeat base pairs were calculated from summing up the base pairs from the overlap of the repeat masker and PhastCons Placental Mammal Conserved Elements, 28-way Multiz Alignment intervals. The non-conserved repeat base pairs were calculated by subtracting conserved repeat base pairs from total repeat base pairs. The total conserved non-repeat base pairs were calculated by subtracting conserved repeat base pairs from conserved base pairs. The total non-conserved non-repeat base pairs were calculated by subtracting non-conserved repeat base pairs from non-conserved base pairs.

**Supplemental Table S3. Enumeration of pTRRs and base pairs of Developmental and Non-developmental gene sub-regions.**

Developmental genes were identified using GO Slimmer to filter for ENCODE region genes labeled with gene ontology term. GO:0032502. Non-developmental genes are those not labeled with GO:0032502. Distribution of putative transcriptional regulatory regions (pTRRs) partitioned into sub-regions from King et al. [26]. Conserved pTRRs are defined as regions overlapping the phastCons PhastCons Placental Mammal Conserved Elements, 28-way Multiz Alignment intervals [41, 43], non-conserved pTRRs defined as all other pTRRs. pTRRs were assigned to a partitioned region using Galaxy Gencode partition tool [55]. Base pairs in ENCODE partitioned sub-regions comes from summing up base pairs in each partitioned ENCODE defined region. Base pairs in conserved region is defined as sum of all genomic regions in the ENCODE region that are identified as PhastCons Placental Mammal Conserved Elements, 28-way Multiz Alignment intervals [43]. Non-conserved base pairs were calculated by subtracting conserved base pairs from total base pairs. Total repeat base pair was calculated by summing up the repeat masked base pairs in each sub-region. Conserved repeat base pairs were calculated from summing up the base pairs from the overlap of the repeat masker and PhastCons Placental Mammal Conserved Elements, 28-way Multiz Alignment intervals. The non-conserved repeat base pairs were

calculated by subtracting conserved repeat base pairs from total repeat base pairs. The total conserved non-repeat base pairs were calculated by subtracting conserved repeat base pairs from conserved base pairs. The total non-conserved non-repeat base pairs were calculated by subtracting non-conserved repeat base pairs from non-conserved base pairs.

**Supplemental Table S4- Enumeration of pTRRs and base pairs of Gene Deserts and Non-gene desert ENCODE sub-regions.**

Distribution of putative transcriptional regulatory regions (pTRRs) partitioned into sub-regions from King et al. [26]. Conserved pTRRs are defined as regions overlapping the PhastCons Placental Mammal Conserved Elements, 28-way Multiz Alignment intervals [41, 43], non-conserved pTRRs defined as all other pTRRs. pTRRs were assigned to a partitioned region using Galaxy Gencode partition tool [55]. Base pairs in ENCODE partitioned sub-regions comes from summing up base pairs in each partitioned ENCODE defined region. Base pairs in conserved region is defined as sum of all genomic regions in the ENCODE region that are identified as PhastCons Placental Mammal Conserved Elements, 28-way Multiz Alignment intervals [43]. Non-conserved base pairs were calculated by subtracting conserved base pairs from total base pairs. Total repeat base pair was calculated by summing up the repeat masked base pairs in each sub-region. Conserved repeat base pairs were calculated from summing up the base pairs from the overlap of the repeat masker and PhastCons Placental Mammal Conserved Elements, 28-way Multiz Alignment intervals. The non-conserved repeat base pairs were calculated by subtracting conserved repeat base pairs from total repeat base pairs. The total conserved non-repeat base pairs were calculated by subtracting conserved repeat base pairs from conserved base pairs. The total non-conserved non-repeat base pairs were calculated by subtracting non-conserved repeat base pairs from non-conserved base pairs.

**Supplemental Table S2.**

| ENCODE<br>Sub-<br>regions<br>Analyzed | Conserved<br>pTRRs | Non-<br>conserved<br>pTRRs | Total bp   | Conserved<br>bp | Non-<br>conserved<br>bp | Total<br>Repeat<br>bp | Total<br>Conserved<br>Repeat bp | Total<br>non-<br>conserved<br>repeat bp | Non-<br>conserved<br>non-<br>repeat bp | Conserved<br>Non-<br>repeat bp |
|---------------------------------------|--------------------|----------------------------|------------|-----------------|-------------------------|-----------------------|---------------------------------|-----------------------------------------|----------------------------------------|--------------------------------|
| 5' UTR                                | 71                 | 46                         | 99,440     | 32,447          | 66,993                  | 27,548                | 3,360                           | 24,188                                  | 42,805                                 | 29,087                         |
| 3' UTR                                | 15                 | 12                         | 382,329    | 84,376          | 297,953                 | 77,108                | 2,471                           | 74,637                                  | 223,316                                | 81,905                         |
| Intergenic<br>Proximal                | 61                 | 163                        | 2,429,196  | 72,270          | 2,356,926               | 1,220,699             | 5,542                           | 1,215,157                               | 1,141,769                              | 66,728                         |
| Intergenic<br>Distal                  | 48                 | 171                        | 11,055,834 | 361,325         | 10,694,509              | 5,648,729             | 21,845                          | 5,626,884                               | 5,067,625                              | 339,480                        |
| Intronic<br>Proximal                  | 173                | 457                        | 8,903,959  | 253,108         | 8,650,851               | 3,733,203             | 18,527                          | 3,714,676                               | 4,936,175                              | 234,581                        |
| Intronic<br>Distal                    | 55                 | 122                        | 6,462,925  | 234,227         | 6,228,698               | 2,797,328             | 12,801                          | 2,784,527                               | 3,444,171                              | 221,426                        |
| Coding<br>sequences                   | 0                  | 0                          | 671,166    | 546,622         | 124,544                 | 36,082                | 5,076                           | 31,006                                  | 93,538                                 | 541,546                        |

**Supplemental Table S3.**

| ENCODE Sub-<br>regions Analyzed                 | Conserved<br>pTRRs | Non-<br>conserved<br>pTRRs | Total bp  | Conserved<br>bp | Non-<br>conserved<br>bp | Total<br>Repeat<br>bp | Total<br>Conserved<br>Repeat bp | Total<br>non-<br>conserved<br>repeat bp | Non-<br>conserved<br>non-<br>repeat bp | Conserved<br>Non-<br>repeat bp |
|-------------------------------------------------|--------------------|----------------------------|-----------|-----------------|-------------------------|-----------------------|---------------------------------|-----------------------------------------|----------------------------------------|--------------------------------|
| Developmental<br>Intergenic<br>Proximal         | 20                 | 22                         | 392,692   | 31,822          | 360,870                 | 169,007               | 1,658                           | 167,349                                 | 193,521                                | 30,164                         |
| Developmental<br>Intergenic Distal              | 5                  | 20                         | 1,636,075 | 56,850          | 1,579,225               | 626,673               | 3,282                           | 623,391                                 | 955,834                                | 53,568                         |
| Non-<br>developmental<br>Intergenic<br>Proximal | 24                 | 86                         | 733,487   | 20,809          | 712,678                 | 402,526               | 1,102                           | 401,424                                 | 311,254                                | 19,707                         |
| Non-<br>developmental<br>Intergenic Distal      | 10                 | 51                         | 2,309,353 | 61,601          | 2,247,752               | 1,310,832             | 3,845                           | 1,306,987                               | 940,765                                | 57,756                         |

**Supplemental Table S4**

| ENCODE<br>Sub-regions<br>Analyzed                  | Conserved<br>pTRRs | Non-<br>conserved<br>pTRRs | Total bp  | Conserved<br>bp | Non-<br>conserved<br>bp | Total<br>Repeat<br>bp | Total<br>Conserved<br>Repeat bp | Total<br>non-<br>conserved<br>repeat bp | Non-<br>conserved<br>non-<br>repeat bp | Conserved<br>Non-<br>repeat bp |
|----------------------------------------------------|--------------------|----------------------------|-----------|-----------------|-------------------------|-----------------------|---------------------------------|-----------------------------------------|----------------------------------------|--------------------------------|
| Non-Gene<br>Desert<br>Intergenic<br>Distal Regions | 39                 | 159                        | 7,147,316 | 206,965         | 6,940,351               | 3,925,643             | 13,771                          | 3,911,872                               | 3,028,479                              | 193,194                        |
| Gene Deserts<br>Intergenic<br>Distal               | 9                  | 12                         | 3,908,518 | 154,360         | 3,754,158               | 1,943,443             | 8,074                           | 1,935,369                               | 1,818,789                              | 146,286                        |
| Gene Deserts<br>Intergenic<br>Proximal             | 0                  | 3                          | 75,000    | 6,529           | 68,471                  | 33,785                | 276                             | 33,509                                  | 41,491                                 | 6,253                          |
| Non-gene<br>deserts<br>intergenic<br>proximal      | 61                 | 160                        | 2,354,196 | 65,741          | 2,288,455               | 1,186,914             | 5,266                           | 1,181,648                               | 1,100,278                              | 60,475                         |
